# Supplementary material
Source: Springer Nature journal article supplement (https://www.springermedizin.de/resource/supplementary/12885_2008_1436_MOESM4_ESM.pdf/9472000)

**BST2-Breast Cancer without bone metastasis**

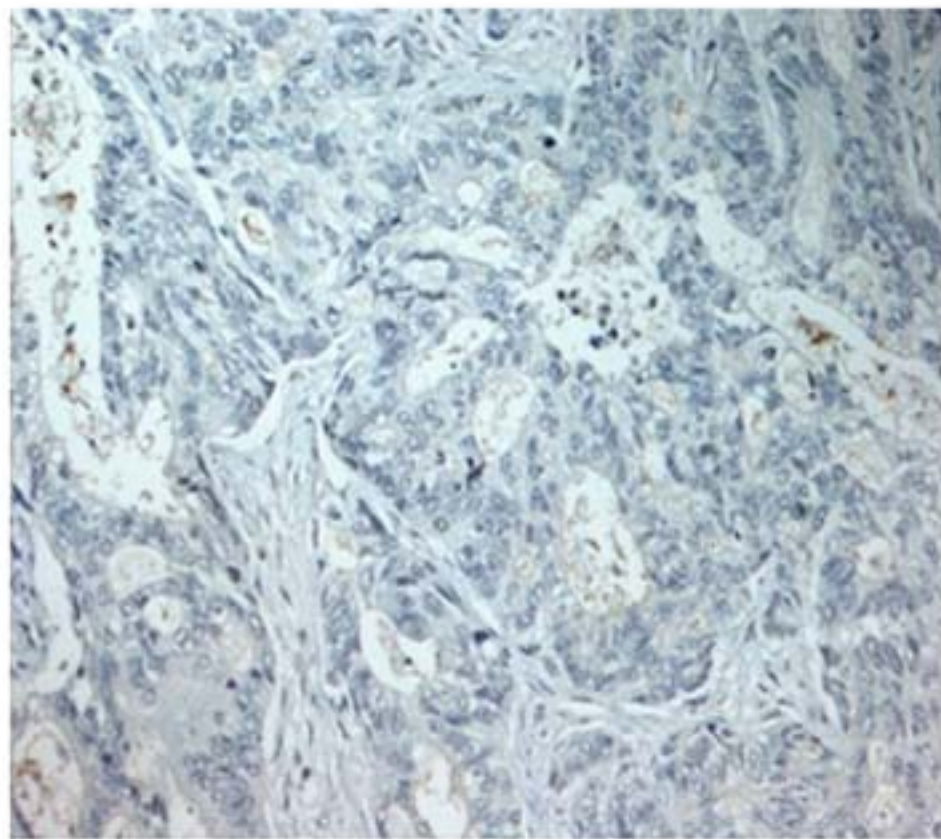

**BST2-Breast Cancer with bone metastasis**

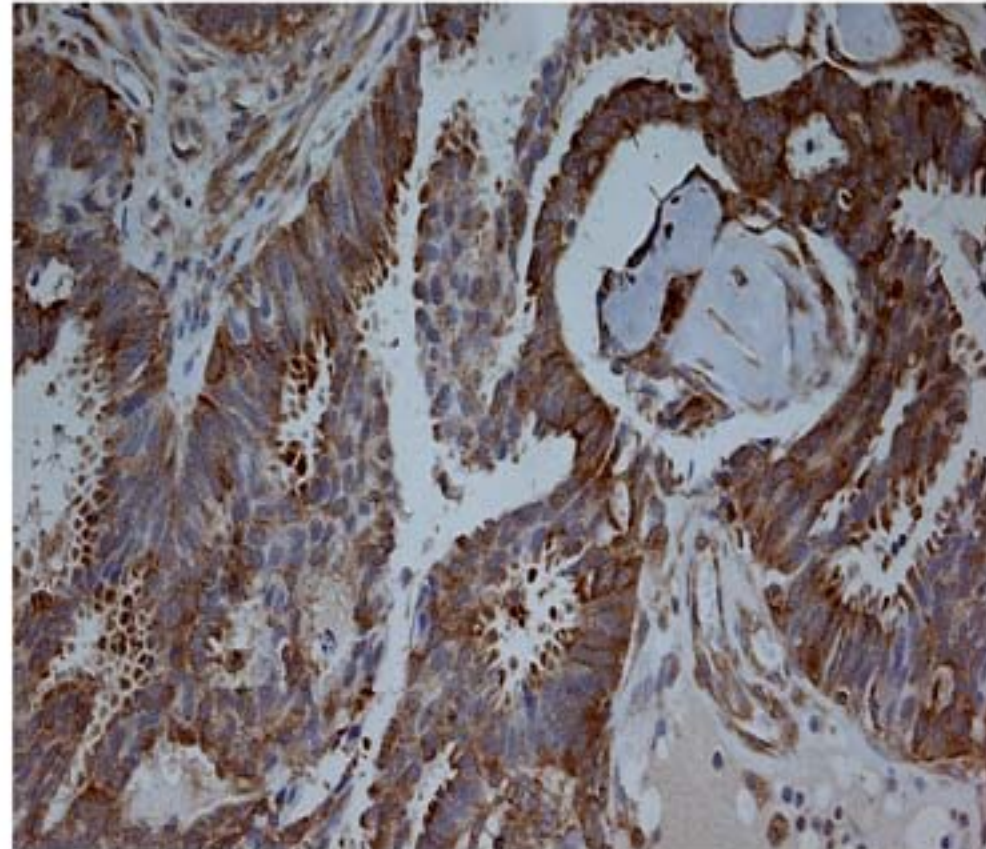

Supplement: MOESM4 [file 9472000]
